# Supplementary material for: A novel lineage-tracing tool reveals that hypoxic tumor cells drive tumor relapse after radiotherapy
Source: PubMed Central journal article supplement — Radiother Oncol. 2025 Jan;202:110592. doi: 10.1016/j.radonc.2024.110592 (PMC11718160; doi:10.1016/j.radonc.2024.110592), 2025-01

Supplementary Figure 1 (extended figure 1): Development and validation of the HIF-1A-Cre-ERT2-UnaG hypoxia reporter in H1299 cells.

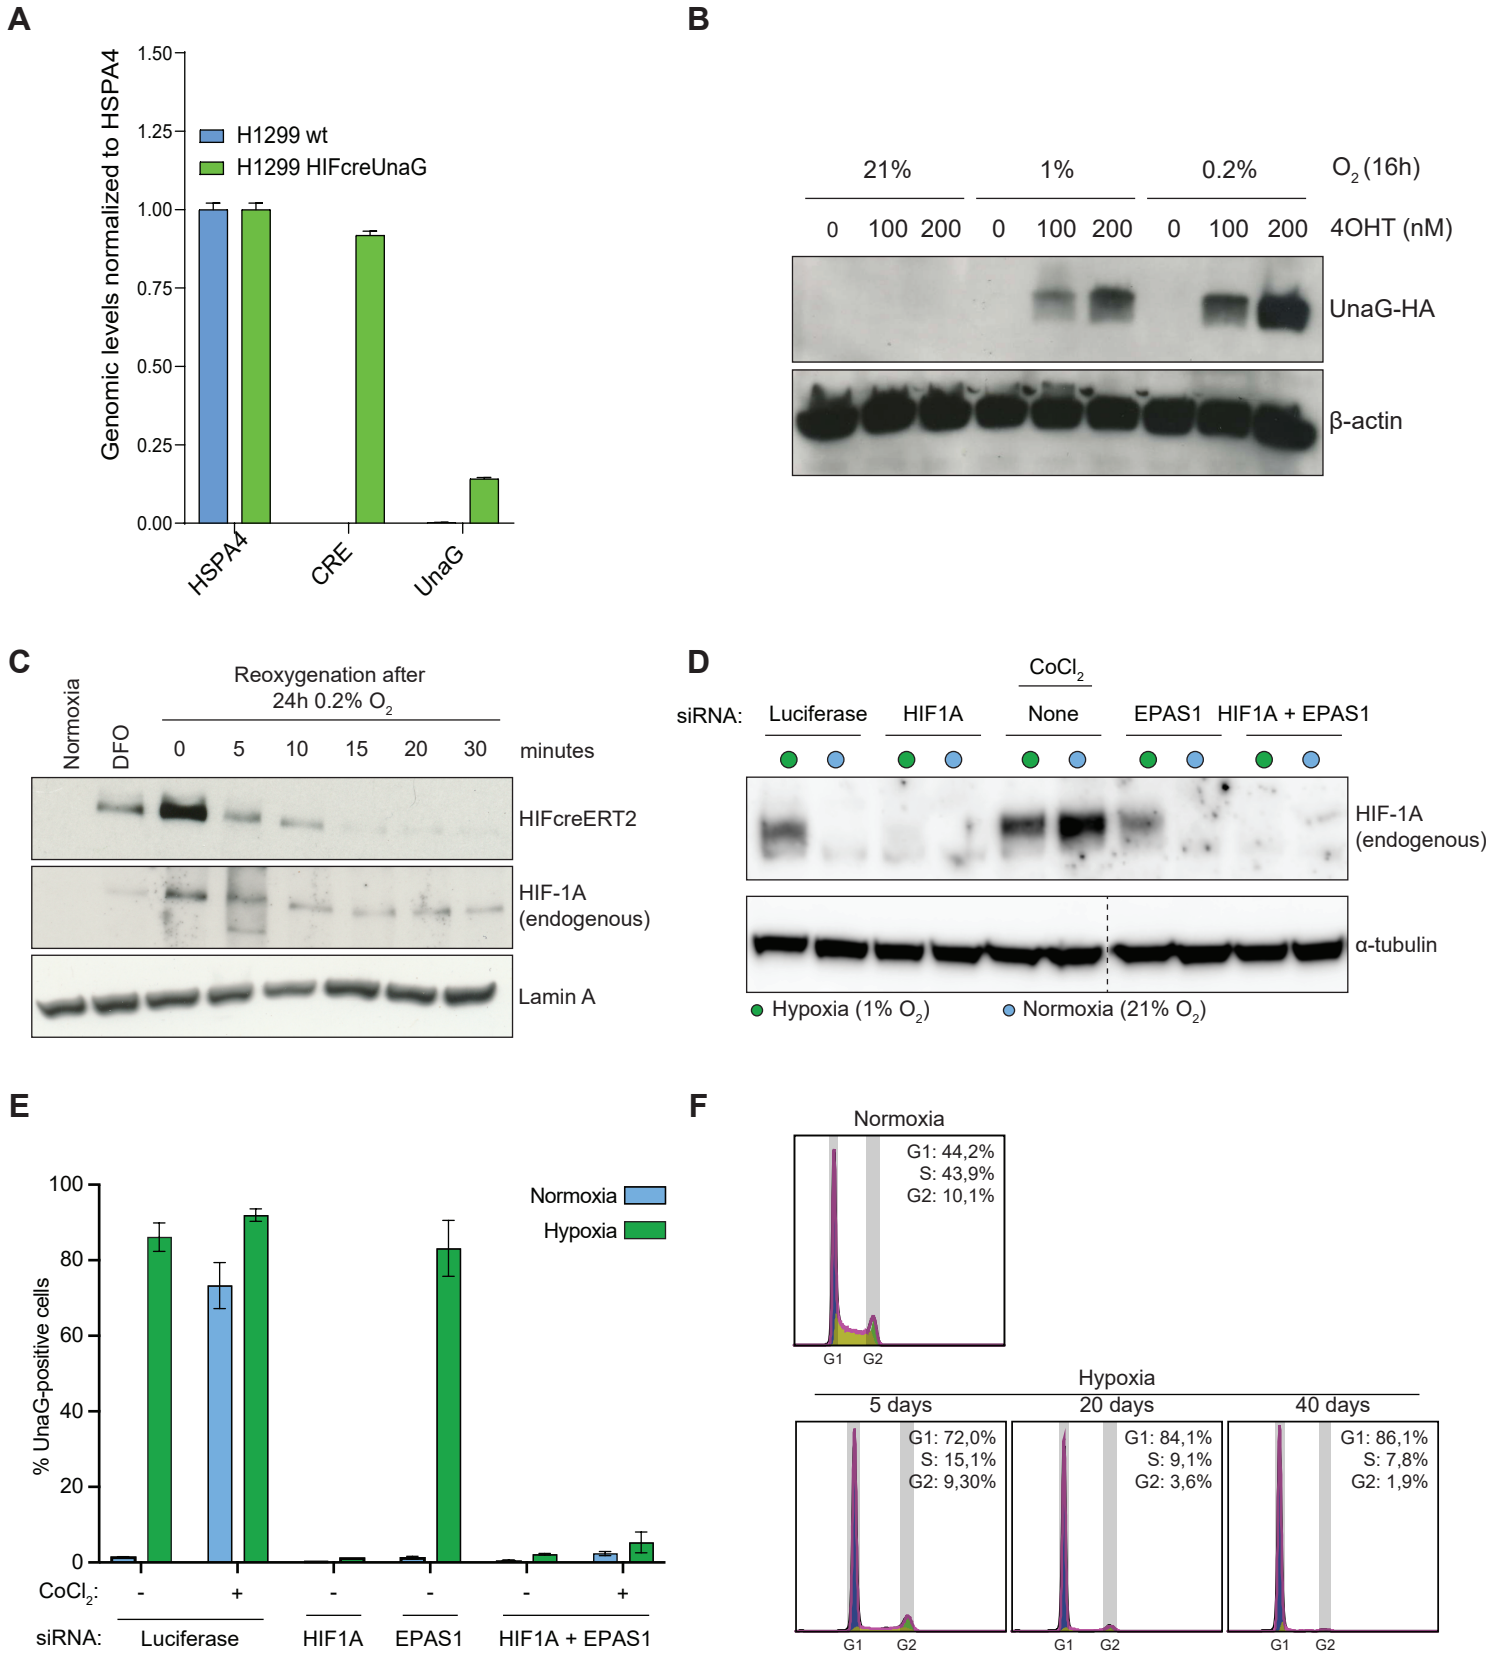

Supplement: mmc2.pdf [file mmc2.pdf]
