# Supplementary material for: A novel lineage-tracing tool reveals that hypoxic tumor cells drive tumor relapse after radiotherapy
Source: PubMed Central journal article supplement — Radiother Oncol. 2025 Jan;202:110592. doi: 10.1016/j.radonc.2024.110592 (PMC11718160; doi:10.1016/j.radonc.2024.110592), 2025-01

**Supplementary Figure 2 (extended figure 2):** H1299-HIFcreUnaG spheroids contain areas of hypoxia where UnaG<sup>+</sup> cells reside and upon irradiation UnaG<sup>+</sup> cells enrich in the spheroids.

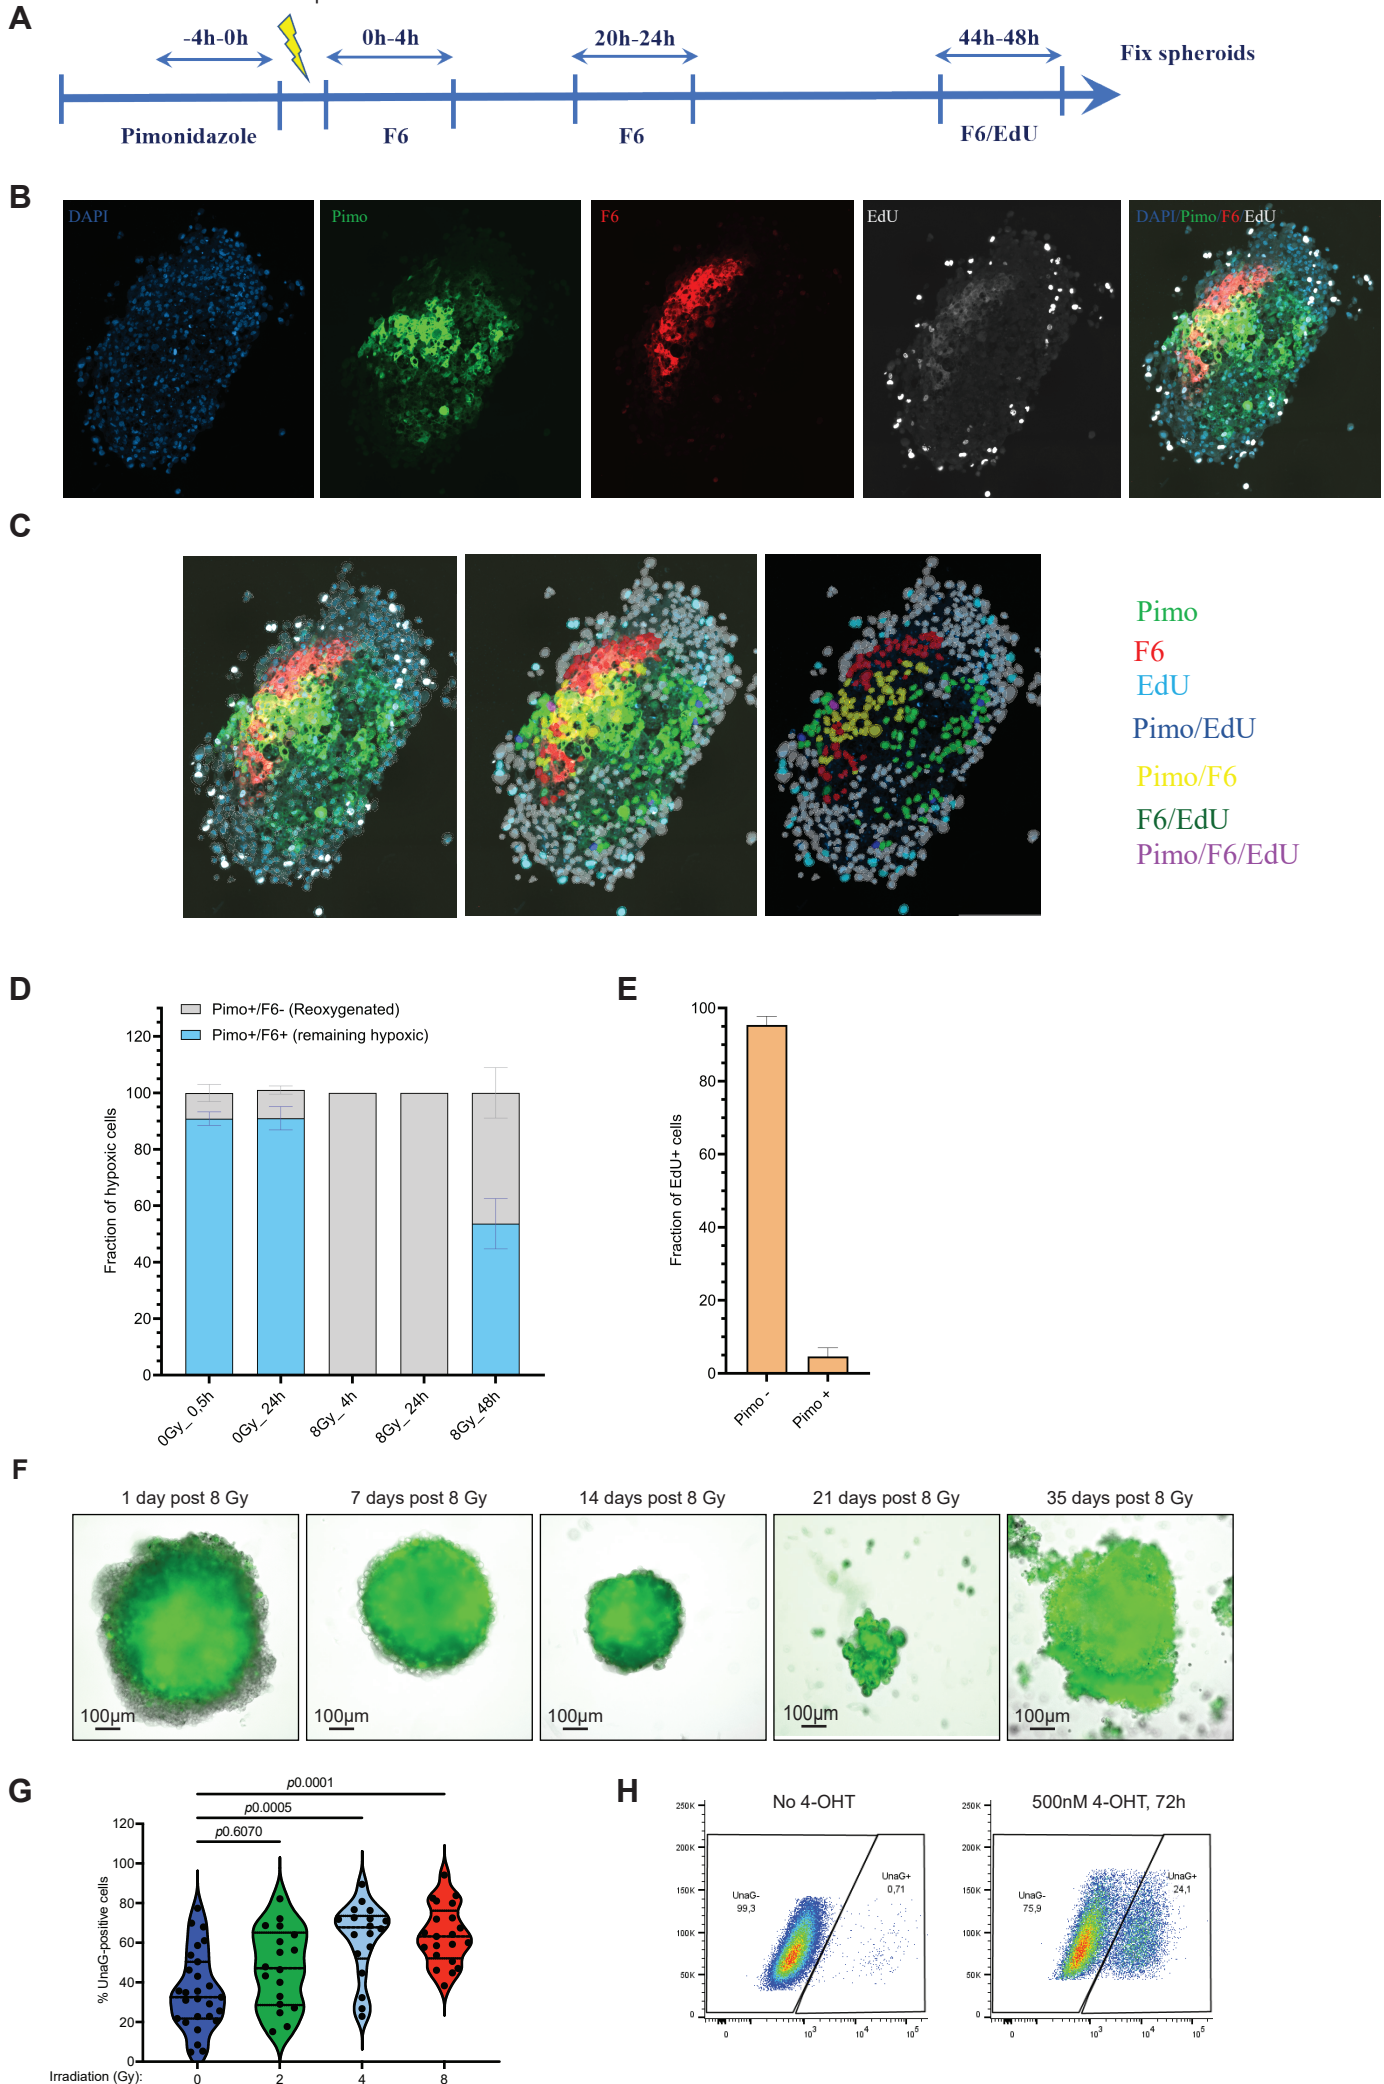

Supplement: mmc3.pdf [file mmc3.pdf]
