# Supplementary material for: A novel lineage-tracing tool reveals that hypoxic tumor cells drive tumor relapse after radiotherapy
Source: PubMed Central journal article supplement — Radiother Oncol. 2025 Jan;202:110592. doi: 10.1016/j.radonc.2024.110592 (PMC11718160; doi:10.1016/j.radonc.2024.110592), 2025-01

**Supplementary Figure 5: Development and validation of the HIF-1A-Cre-ERT2-DsRed/eGFP hypoxia reporter in 4T1 cells**

**A)**

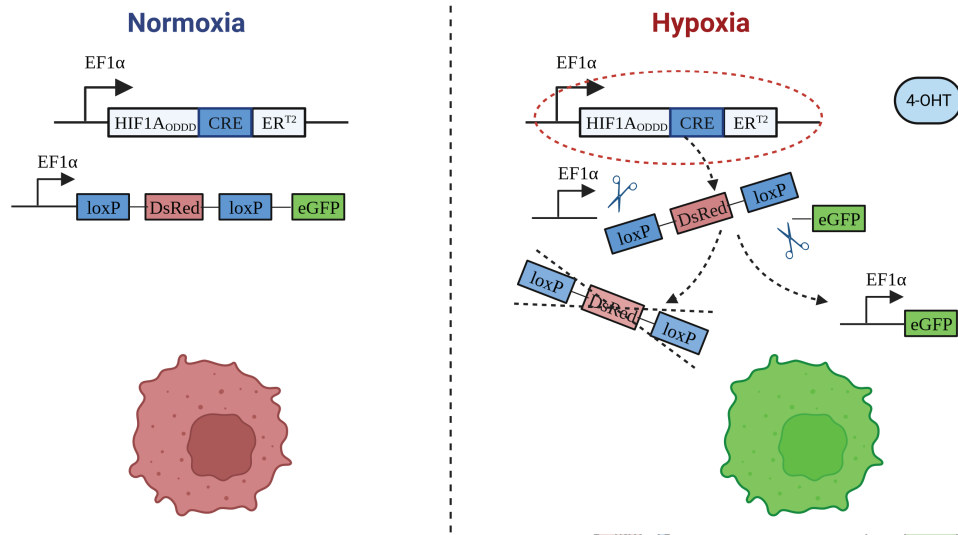

**B)**

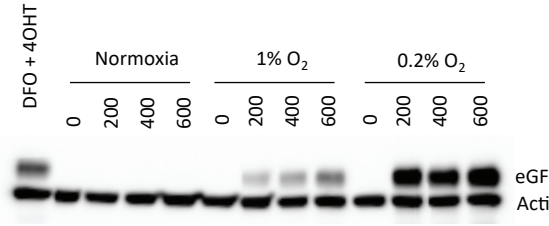

**C)**

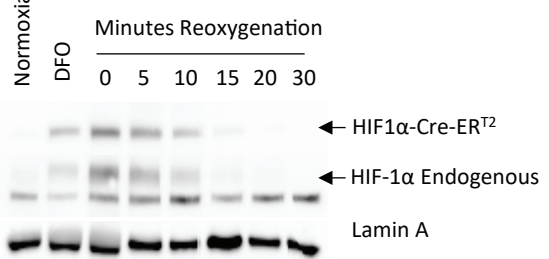

**D)**

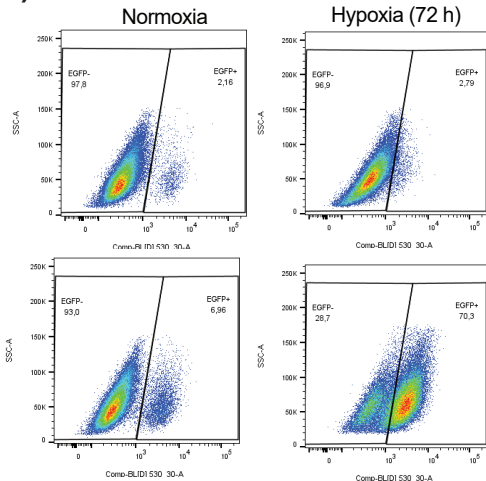

**E)**

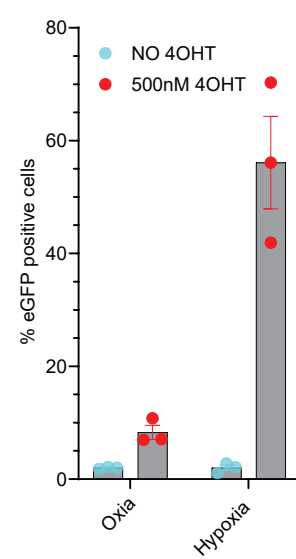

**F)**

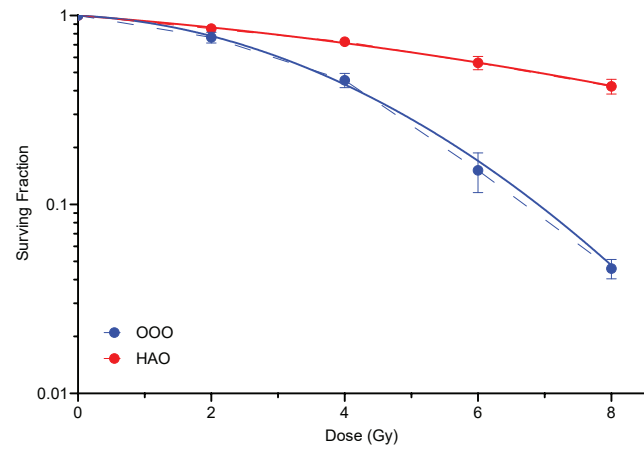

**G)**

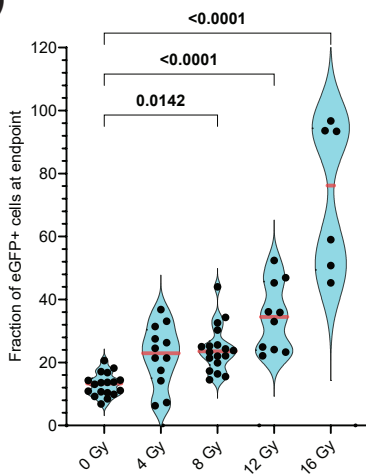

**I)**

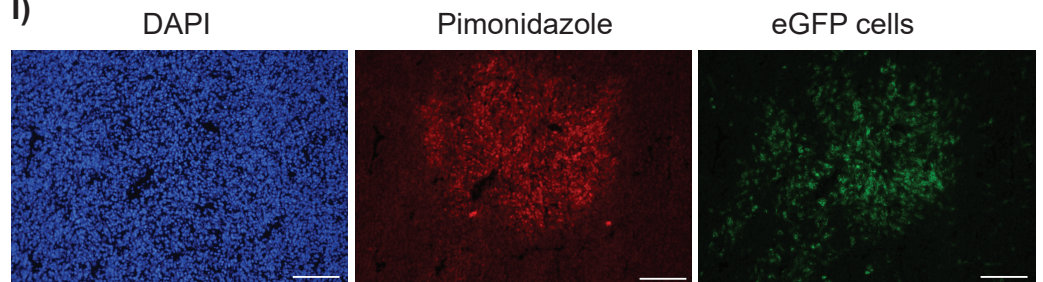

**H)**

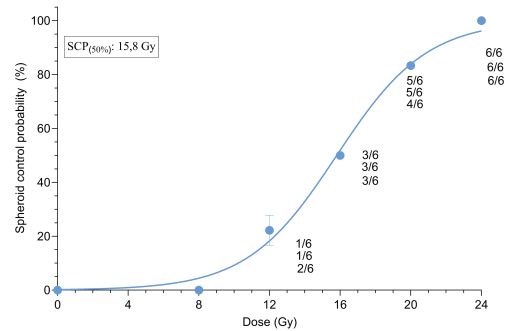

**J)**

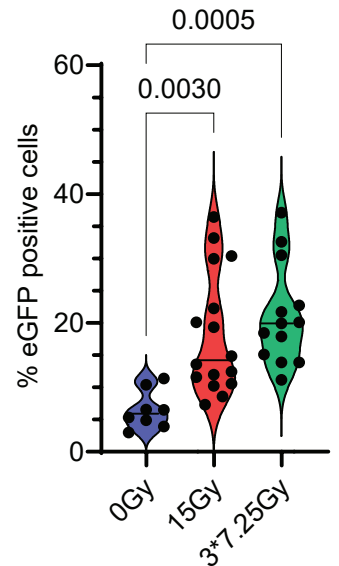

Supplement: mmc6.pdf [file mmc6.pdf]
