# Supplementary figures and images for: A novel lineage-tracing tool reveals that hypoxic tumor cells drive tumor relapse after radiotherapy
Source: PubMed Central journal article supplement — Radiother Oncol. 2025 Jan;202:110592. doi: 10.1016/j.radonc.2024.110592 (PMC11718160; doi:10.1016/j.radonc.2024.110592), 2025-01

A

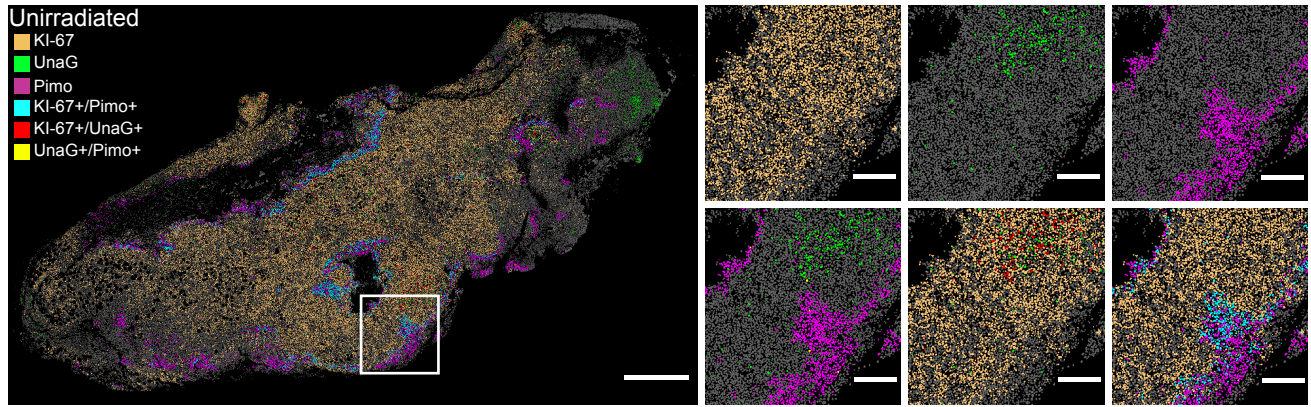

B

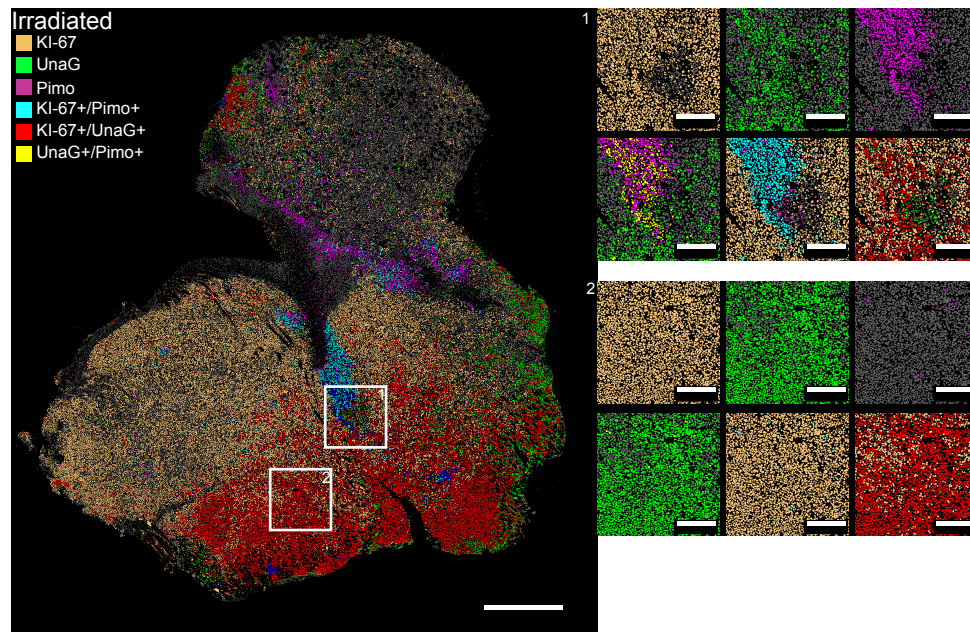

Supplement: mmc5.pdf [file mmc5.pdf]
